1 **The origin and diversification of pteropods predate past**  
2 **perturbations in the Earth's carbon cycle**

3

4 Katja T.C.A. Peijnenburg<sup>1,2,\*</sup>, Arie W. Janssen<sup>1</sup>, Deborah Wall-Palmer<sup>1</sup>, Erica Goetze<sup>3</sup>, Amy  
5 Maas<sup>6</sup>, Jonathan A. Todd<sup>4</sup>, Ferdinand Marlétaz<sup>5,\*</sup>

6

7 \* Corresponding authors: Katja T.C.A. Peijnenburg, Ferdinand Marlétaz

8

9 <sup>1</sup> Marine Biodiversity, Naturalis Biodiversity Center, P.O. Box 9517, 2300 RA Leiden, The  
10 Netherlands

11 <sup>2</sup> Department Freshwater and Marine Ecology, Institute for Biodiversity and Ecosystem  
12 Dynamics, University of Amsterdam, P.O. Box 94248, 1090 GE Amsterdam, The  
13 Netherlands

14 <sup>3</sup> Department of Oceanography, School of Ocean and Earth Science and Technology,  
15 University of Hawai'i, Honolulu, United States of America

16 <sup>4</sup> Department of Earth Sciences, Natural History Museum London, SW7 5BD, United  
17 Kingdom

18 <sup>5</sup> Molecular Genetics Unit, Okinawa Institute of Science and Technology, Onna-son, Japan

19 <sup>6</sup> Bermuda Institute of Ocean Sciences, St. Georges GE01, Bermuda

20

21

22 **Summary**

23

24 **Pteropods are a group of planktonic gastropods that are widely regarded as biological**  
25 **indicators for assessing the impacts of ocean acidification (OA). Their thin aragonitic**  
26 **shells are highly sensitive to acute changes in ocean chemistry. However, to gain insight**  
27 **into their potential to adapt to current climate change, we need to accurately**  
28 **reconstruct their evolutionary history and assess their responses to past changes in**  
29 **Earth's carbon cycle. Here, we resolve the phylogeny and timing of pteropod evolution**  
30 **with a phylogenomic dataset incorporating 21 new species and new fossil evidence. In**  
31 **agreement with traditional taxonomy, we recovered the first molecular support for a**  
32 **division between sea butterflies (Thecosomata: mucus-web feeders) and sea angels**  
33 **(Gymnosomata: active predators). Molecular dating demonstrated that these two**  
34 **lineages diverged in the early Cretaceous, and that all main pteropod clades, including**  
35 **shelled, partially-shelled and unshelled groups, diverged in the mid to late Cretaceous.**  
36 **Hence, these clades originated prior to and subsequently survived major global change**

37 **events, including the Paleocene Eocene Thermal Maximum (PETM), which is the closest**  
38 **analogue to modern-day ocean acidification and warming. Our findings indicate that**  
39 **aragonitic calcifiers have been resilient to extreme perturbations in the Earth's carbon**  
40 **cycle over evolutionary timescales.**

41

42

### 43 **Introduction**

44

45 Pteropods are marine gastropods that spend their entire life in the open water column. A  
46 remarkable example of adaptation to pelagic life, these mesmerizing animals have thin shells  
47 and a snail foot transformed into two wing-like structures that enable them to 'fly' through  
48 the water column (Fig. 1). Pteropods are a common component of marine zooplankton  
49 assemblages worldwide, where they serve important trophic roles in pelagic food webs, and  
50 are major contributors to carbon and carbonate fluxes in the open ocean (Berner and Honjo  
51 1981; Hunt et al. 2008; Bednaršek et al. 2012a; Manno et al. 2018; Buitenhuis et al. 2019).

52

53 Shelled pteropods have been a particular focus for global change research because they make  
54 their shells of aragonite, a metastable form of calcium carbonate that is one and a half times  
55 more soluble than calcite (Mucci 1983; Sun et al. 2015). As their shells are susceptible to  
56 dissolution, pteropods have been called 'canaries in the coal mine', or sentinel species that  
57 signal the impacts of ocean acidification on marine calcifiers (e.g. Bednaršek et al. 2017a,  
58 Manno et al. 2017). Although shelled pteropods are already negatively affected in several  
59 regions of the global ocean (e.g. Bednaršek et al. 2012b; 2017b; Maas et al. in review), and  
60 will likely be seriously threatened if CO<sub>2</sub> levels continue to rise (e.g. Moya et al. 2016; Maas  
61 et al. 2016; 2018), little is known about the evolutionary history of the group.

62

63 Improving the phylogenetic framework for pteropods and estimating the timing of divergence  
64 for major lineages will help determine what effect past periods of high atmospheric CO<sub>2</sub>, such  
65 as the Paleocene Eocene Thermal Maximum (PETM), have had on their diversification and  
66 survivorship. The PETM is widely regarded as the closest geological analogue to the modern  
67 rise in ocean-atmosphere CO<sub>2</sub> levels, global warming and ocean acidification (Zachos et al.  
68 2005; Hönisch et al. 2012; Penman et al. 2014). Knowing whether major pteropod lineages  
69 have been exposed during their evolutionary history to periods of high CO<sub>2</sub> is important to  
70 extrapolate from current experimental and observational studies to predictions of species-  
71 level responses to global change over longer timescales.

72

73 Pteropods are uniquely suited to shed light on long-term marine evolutionary dynamics,  
74 because they are the only living metazoan plankton with a good fossil record (Bé & Gilmer  
75 1977). The only other pelagic groups with abundant fossil records are protists, including  
76 foraminifers, radiolarians, coccolithophores, and extinct animal lineages, such as ammonites.  
77 The pteropod fossil record extends from a rare internal mold of *Heliconoides* sp. from the  
78 Campanian, late Cretaceous (72.1 Million years ago (Ma), Janssen & Goedert 2016) to the  
79 present, with abundant fossils from the Eocene onwards (from ~ 56 Ma, reviewed in Janssen  
80 & Peijnenburg 2017). However, the fossil record of pteropods is somewhat limited because  
81 their shells are very thin and are only preserved in waters above the aragonite saturation  
82 depth, which is shallower than the saturation depth of calcite (Gerhardt & Henrich 2001). In  
83 addition, several groups of pteropods have only partial shells or are shell-less as adults and  
84 thus are rarely preserved in marine sediments. Hence, resolving the evolutionary history of  
85 pteropods requires a combination of molecular and fossil-based approaches to resolve past  
86 diversification and timing.

87

88 While most researchers recognise pteropods as being comprised of two orders, Thecosomata  
89 ('sea butterflies') and Gymnosomata ('sea angels'), a recent taxonomic revision (Bouchet et  
90 al. 2017) identifies three suborders: 1) Euthecosomata, fully-shelled, omnivorous mucus-web  
91 feeders, 2) Pseudothechosomata, a poorly known group with shelled, partially-shelled and  
92 unshelled species that also use mucus webs for feeding, and 3) Gymnosomata, with shell-less  
93 adults that are specialised predators, primarily on euthecosomes. Progressive evolution  
94 towards loss of shells as an adaptation to planktonic life has been proposed for the group  
95 (Lalli & Gilmer 1989; Spoel & Dadon 1999), but never fully tested.

96

97 Previous attempts to resolve the molecular phylogeny of pteropods have relied on small  
98 subsets of genes, and resolution has been limited, especially at deeper nodes, due to large rate  
99 heterogeneity and insufficient taxonomic signal (Klussmann-Kolb & Dinapoli 2006; Jennings  
100 et al. 2010; Corse et al. 2013; Burridge et al. 2017). Here we used a phylogenomic approach  
101 based on transcriptome sequencing to fully resolve the phylogeny of pteropods. Using the  
102 pteropod fossil record to calibrate the timing of divergence, we estimate that two major  
103 groups of pteropods, 'sea butterflies' and 'sea angels' diverged in the early Cretaceous, and  
104 thus must have survived previous global perturbations to the ocean's carbonate system.

105

106 Main text (results & discussion)

107

108 **Robust phylogenomic resolution.** We generated new transcriptome data for 22 pteropod  
109 samples corresponding to 21 species collected along two basin-scale transects in the Atlantic

110 Ocean (Table S1 and S2). We also incorporated available data for three additional pteropod  
111 species (Moya et al. 2016; Maas et al. 2018; Zapata et al. 2014) and three outgroup species:  
112 the sea hare *Aplysia californica*, within the proposed sister group of pteropods (Aplysiida),  
113 and two members of Cephalaspidea, *Haminoea antillarum* and *Philine angasi*, from Zapata et  
114 al. (2014). Our taxonomic sampling included representatives of all extant families of  
115 Euthecosomata, two of three families of Pseudothechosomata, and two of six families of  
116 Gymnosomata. All superfamilies of Pteropoda were sampled except Hydromyloidea  
117 (Gymnosomata).

118

119 We inferred a set of single-copy orthologues using gene family reconstruction from  
120 assembled and translated transcripts and selected 2654 single-copy nuclear genes for  
121 phylogenetic inference based on their taxonomic representation. These selected genes are  
122 well-represented in our transcriptomes with a median of 1815 genes per species, the least  
123 being 682 genes (77.4% missing data) for *Diacria trispinosa* (Table S2). We combined these  
124 single-copy orthologues in a large data matrix of 834,394 amino acids with 35.75% missing  
125 data.

126

127 Using the large data matrix (2654 genes) and a site-homogeneous model of evolution  
128 (LG+ $\Gamma_4$ ), we recovered a fully resolved phylogenetic tree with maximal support values at all  
129 interspecific nodes (Figure 1). To account for the putative limitations of site-homogeneous  
130 models that could lead to systematic error, we also applied a site-heterogeneous model  
131 (CAT+GTR+ $\Gamma$ ) using Bayesian inference (Figure S1). For this analysis, we used a reduced  
132 data matrix comprised of the 200 most informative genes (108,008 amino acids, see Methods)  
133 and we recovered an identical topology but for a single terminal node (Figure S1).

134

135 **Pteropod systematics reappraised.** Our trees confirm that pteropods are a monophyletic  
136 group with sea hares (*Aplysia*) as their closest sister group (Klussmann-Kolb & Dinapoli  
137 2006; Zapata et al. 2014). Pteropods are split into two monophyletic clades: Thecosomata and  
138 Gymnosomata, which is congruent with the traditional classification but strongly supported  
139 by molecular evidence for the first time. An obvious shared character for pteropods are the  
140 wing-like structures or ‘parapodia’ used for swimming. Histological and ultrastructural  
141 studies showed that the muscle arrangements in parapodia are very complex and look similar  
142 in Thecosomata and Gymnosomata, supporting a homologous origin (Klussmann-Kolb &  
143 Dinapoli 2006). Thecosomata comprise the Euthecosomata and Pseudothechosomata clades,  
144 whose member species are all omnivorous mucus-web feeders (Gilmer & Harbison 1986).  
145 Their common feeding mechanism is reflected in the well-developed mucus secreting pallial  
146 gland that is shared among all thecosomes, as well as a muscular gizzard with which they can

147 crush the hard exoskeletons of their prey (Lalli & Gilmer 1989). Gymnosomata are shell-less  
148 at the adult stage and are specialized carnivorous hunters. They have several morphological  
149 characters that set them apart from Thecosomata, including tentacle-like structures called  
150 ‘buccal cones’ and hook sacs to grab and manipulate shelled pteropod prey (Lalli 1970,  
151 Klusmann-Kolb & Dinapoli 2006). Hence, the recent revision by Bouchet et al. (2017) with  
152 three separate suborders (Euthecosomata, Pseudothechosomata, Gymnosomata) should revert  
153 back to the original classification with two main clades: Thecosomata, comprising the  
154 Euthecosomata and Pseudothechosomata, and Gymnosomata as shown in Figure 1. Within the  
155 fully-shelled Euthecosomata, we obtained maximal support for the coiled (Limacinoidea) and  
156 uncoiled (Cavolinioidea) superfamilies as monophyletic sister clades for the first time in a  
157 molecular analysis. These results finally stabilize the higher-level taxonomy of the group,  
158 which has been debated ever since Cuvier (1804) established the Pteropoda as a separate  
159 order of molluscs.

160

161 In agreement with previous molecular phylogenetic analyses (Corse et al. 2013; BurrIDGE et  
162 al. 2017), we find good support for lower level groupings (e.g. genera *Diacria* and *Limacina*)  
163 and recover *Creseis* as the earliest diverging lineage within the uncoiled shelled pteropods.  
164 The genus *Clio*, however, is paraphyletic in our analyses with *Clio cuspidata* and *Cuvierina*  
165 *atlantica* grouping together, and *Clio pyramidata* either as a sister taxon to this group  
166 (maximum-likelihood tree, Fig. 1) or to the clade *Cavolinia* + *Diacavolinia* + *Diacria*  
167 (Bayesian tree, Fig. S1). These results are congruent with the branching obtained using a  
168 wider taxon sampling but only three genes (BurrIDGE et al. 2017). Thus, it seems plausible  
169 that the genus *Clio* consists of two distinct groups, which could be characterised by distinct  
170 larval shell shapes, including *C. cuspidata* and *C. recurva* in one clade, and *C. pyramidata*  
171 and *C. convexa* in the other (Janssen 2012). Sampling of additional species for transcriptome  
172 sequencing and more detailed morphological analysis are necessary to definitively revise the  
173 taxonomy of this genus.

174

175 **Divergence times of major pteropod lineages.** Estimating divergence times based on  
176 genome-scale datasets has been shown to be accurate and powerful, however, this depends on  
177 the use of realistic evolutionary and clock models as well as a reliable fossil calibration  
178 scheme (Tanner et al. 2017; Irisarri et al. 2017). We inferred divergence times of the main  
179 pteropod lineages using a recent revision of their fossil record (Janssen & Peijnenburg 2017),  
180 which provided eight meaningful calibrations (Fig. 2, Table S3). Within the sister clade of  
181 Pteropoda (Aplysiida) the shelled genus *Akera* has by far the best and oldest known fossil  
182 record (Cossmann 1895a, 1895b, Valdes & Lozouet 2000) and we chose the oldest  
183 confidently identified species of *Akera* (*A. neocomiensis*) to provide the calibration for the

184 Aplysiida + Pteropoda clade (Table S3). To ensure accurate reconstructions, we chose a  
185 realistic model of sequence evolution (CAT-GTR) using the reduced data matrix of 200  
186 genes. We performed cross-validation to select the best clock model (CIR, Figure 2) but also  
187 verified that the divergence times reported under alternative clock models, such as  
188 autocorrelated log-normal or uncorrelated gamma multipliers, were not markedly different for  
189 the major clades (Figure S2, Table S4).

190  
191 Our phylogenomic time-tree dates the origin of pteropods to the early Cretaceous (139.1 Ma  
192 with 95% credibility interval (CrI): 188.2-111.4, Fig. 2), which is substantially older than the  
193 estimates based on previous molecular phylogenies (Paleocene and late Cretaceous as  
194 estimated by Corse et al. 2013 and BurrIDGE et al. 2017, respectively). While previous  
195 estimates were based on a few markers, our analyses are based on a much more  
196 comprehensive gene set and rely on more realistic models of evolution and better-curated  
197 fossil calibrations. We also find that divergences of the two main lineages, Thecosomata and  
198 Gymnosomata, are placed in the Cretaceous period, dated at 129.4 (CrI: 175.8-103.3) and  
199 100.7 (137.0-76.4) Ma, respectively. Of the fully shelled pteropods, all coiled species share a  
200 most recent common ancestor at 107 (145.5-85.1) Ma and the uncoiled species at 99.1 (134.7-  
201 78.2) Ma.

202  
203 Different groups of pteropods (sea butterflies and sea angels, species with coiled and uncoiled  
204 shells) were already present in the Cretaceous and thus must have survived previous major  
205 environmental changes and associated extinctions such as the asteroid impact at the end of the  
206 Cretaceous (KT, 66 Ma, Smit & Hertogen 1980; Schulte et al. 2010) and the Paleocene  
207 Eocene Thermal Maximum (PETM, 56 Ma, Kennett & Stott 1991; Dickens et al. 1997;  
208 Zachos et al. 2005) (Fig. 2). Many pelagic groups disappeared during the well-known mass  
209 extinction at the KT boundary (Jablonski 1994), but the multiple environmental factors that  
210 changed simultaneously during this period make it difficult to pinpoint a specific cause of  
211 these changes, such as ocean acidification (Hönisch et al. 2012). The PETM had an impact on  
212 marine calcifiers as shown by a rapid decrease in calcium carbonate content in marine  
213 sediments (Luo et al. 2016) and the recording of one of the largest extinctions among deep-  
214 sea benthic foraminifers (Kennett & Stott 1991; Schmidt et al. 2018). Planktonic calcifiers  
215 were also affected during the PETM, with shifts in species assemblages and changes in  
216 species abundance of calcareous nannoplankton, but no clear signal of increased extinction  
217 (Gibbs et al. 2006, Bown & Pearson 2009; Kelly et al. 1996; Raffi et al. 2009). For the  
218 pteropod fossil record, we see an increase of species from pre-PETM (Thanetian, 2 species) to  
219 post-PETM (Ypresian, 32 species) which led to the suggestion that the PETM might have had  
220 a triggering effect on pteropod evolution (Janssen et al. 2016).



221

222 **Evolutionary history of pteropods.** Our estimated divergence times for the major pteropod  
223 groups predate by far the oldest known fossils for these groups (Fig. 2). The largest  
224 discrepancies are found for Gymnosomata and Pseudothecosomata, for which the oldest  
225 fossils are from the Chattian (probably a *Clione* sp., 28-23 Ma) and Chattian-Burdigalian  
226 periods (*Peracle amberae*, 28-16 Ma), respectively (Janssen 2012). This discrepancy is not  
227 surprising as these groups are characterised by reduced shells or no shells at all as adults and  
228 their microscopic (larval) shells remain mostly uncharacterised. The pteropod fossil record is  
229 generally affected by a strong taphonomic bias as their delicate aragonitic shells preserve  
230 poorly. Furthermore, micropaleontologists have traditionally focused on calcitic planktonic  
231 calcifiers (coccolithophores, foraminifers) rather than aragonite-producing ones, such as  
232 pteropods. This trend is illustrated by plotting the reported diversity of pteropod species  
233 through time (Figure 2), showing a sharp increase in the number of recent species (162)  
234 compared to previous periods (21 species for the Pleistocene and a median of 34.5 species for  
235 the preceding Neogene periods). Since pteropods are considered to be promising new proxy  
236 carriers in palaeoceanography, recording surface ocean temperature and carbonate ion  
237 concentrations (Wall-Palmer et al. 2012; Keul et al. 2017), this renewed interest will  
238 hopefully result in a reappraisal of their fossil record in the coming years.

239

240 Surprisingly, we find similar Cretaceous origins for the coiled (Limacinoidea) and uncoiled  
241 (Cavolinioidea) shelled pteropods even though the fossil record for coiled shells extends  
242 much further (Campanian, late Cretaceous) than for uncoiled shells (Ypresian, early Eocene).  
243 The species with straight, bilaterally symmetrical shells were thought to have derived  
244 from coiled ancestors (*Altaspiratella*) that show a trend of despiralisation in the fossil record  
245 starting during the early Ypresian and giving rise to the oldest representatives of  
246 Cavolinioidea (*Camptoceratops* and *Euchilotheca*) (first suggested by Boas (1886) and  
247 reviewed in Janssen & Peijnenburg 2017). It is interesting to note that shell microstructure  
248 differs fundamentally between coiled and uncoiled pteropods. Uncoiled species have an outer  
249 prismatic layer and a thick inner layer with a unique helical microstructure (Bé et al. 1972; Li  
250 et al. 2015), whereas coiled shells have simple prismatic and crossed lamellar microstructures  
251 (Lalli & Gilmer 1989), similar to the outgroup *Aplysia* (Marin et al. 2018). Examination of  
252 shell microstructures of fossil species could shed further light on the phylogenetic placement  
253 of the fossils. For instance, the fossil *Camptoceratops priscum* from the early Eocene was  
254 found to have helical microstructure similar to extant Cavolinioidea (Curry & Rampal 1979).  
255 A recent report by Garvie et al. (in review) of potentially much older uncoiled pteropod-like  
256 fossils from Mesozoic and Paleocene rocks of the southern United States found that their  
257 microstructure is, in contrast, crossed-lamellar. If future analyses show that these are indeed

258 pteropods, despiralisation must have occurred multiple times throughout their evolutionary  
259 history. Reports of Cretaceous pteropods remain extremely rare despite considerable  
260 paleontological effort, which suggests that pteropods were not abundant and/or very poorly  
261 preserved during this period. Notably, Cretaceous deposits are often dominated by limestones,  
262 which are unsuitable for the preservation of thin-walled aragonitic pteropod shells (Janssen &  
263 Peijnenburg 2017).

264  
265 We found that the shelled groups (sea butterflies) diverged before the unshelled ones (sea  
266 angels), suggesting that unshelled species evolved from shelled ancestors (Fig. 2). However,  
267 we do not see a clear trend toward gradual loss of shells in our phylogeny. This could be  
268 further assessed by sampling more species belonging to the elusive Pseudothecosomata, with  
269 species ranging from fully-shelled (*Peracle* spp.) to partially-shelled (*Cymbulia*, *Corolla*,  
270 *Gleba* spp.) and even entirely unshelled as adults (*Desmopterus* spp.). In our phylogeny, we  
271 only included one *Peracle* species possessing an external coiled calcareous shell and one  
272 *Cymbulia* species bearing a gelatinous ‘pseudoconch’. Since the pteropod outgroups are  
273 benthic gastropods (Aplysiida, Cephalaspidea) with mostly coiled or reduced shells, the  
274 ancestor of pteropods most likely lived on the seafloor and had a coiled shell (Klussmann-  
275 Kolb & Dinapoli 2006; Corse et al. 2013). Some authors proposed that pteropods evolved in a  
276 neotenic fashion, where larvae of benthic gastropods became sexually mature and lived their  
277 full life cycle in the open water column, because of ‘juvenile’ shell characters such as the  
278 sinistral spiral and aragonitic shell structure (Lemche 1948; Huber 1993). However, this  
279 hypothesis has been questioned by Jägersten (1972), who argued that the foot – an adult  
280 feature – played a decisive role in the transition from a benthic to a holoplanktonic existence  
281 by transforming from a creeping organ to swimming fins. It is interesting to note that a  
282 similar hypothesis was proposed for the only other extant group of holoplanktonic gastropods,  
283 the heteropods (Pterotrachoidea). For this group, the earliest fossil, *Coelodiscus minutus*,  
284 dates back to the early Jurassic and represents the oldest known holoplanktonic gastropod  
285 (Teichert & Nützel 2015). Colonization of the open water column required numerous  
286 adaptations in both groups of holoplanktonic gastropods independently: pteropods belonging  
287 to Heterobranchia and heteropods belonging to Caenogastropoda.

288  
289 **Fate of sea butterflies and angels from Cretaceous to Anthropocene.** Pteropods evolved in  
290 the early Cretaceous and thus were contemporaries of other major calcifying groups in the  
291 open ocean, such as ammonites and foraminifers (Fig. 2). Based on their fossil records, Tajika  
292 et al. (2018) suggested that planktonic gastropods filled the ecological niche left empty by  
293 juvenile ammonites after their extinction at the end of the Cretaceous. However, this seems  
294 less likely given our earlier estimated origins of both sea butterflies (thecosomes) and sea



295 angels (gymnosomes). Instead, we propose that sea angels evolved as specialized predators of  
296 sea butterflies during the Cretaceous, perhaps in an evolutionary arms race (Seibel et al. 2007)  
297 in which thecosomes evolved stronger and ever more sophisticated shells (e.g. *Diacria*,  
298 *Cavolinia*) and gymnosomes evolved adaptations for prey capture and extraction, specific to  
299 the shell shapes of their prey. For instance, *Clione* feed exclusively on certain *Limacina*  
300 species by manipulating the coiled shells with their flexible buccal cones and extracting the  
301 prey with their hooks, whilst *Pneumodermopsis* feed on long and straight-shelled *Creseis*  
302 species using their long and flexible proboscis for prey extraction. There are also accounts of  
303 unsuccessful attacks, which happen when sea butterflies retract rapidly enough and far  
304 enough into their shell (Conover & Lalli 1972, Lalli & Gilmer 1989). Moreover, even though  
305 thecosomes are eaten by a variety of predators ranging from planktonic crustaceans to fish,  
306 whales and seabirds, no other pelagic group than gymnosomes feeds predominantly on  
307 thecosomes. Hence, we consider it plausible that different groups of pteropods co-evolved  
308 during a period that is referred to as the Marine Mesozoic Revolution. In this major  
309 evolutionary episode, a series of ecological shifts took place on the sea floor because of the  
310 evolution of powerful, relatively small, shell-destroying predators, including a massive  
311 radiation of predatory gastropods in the Early Cretaceous (Vermeij 1977; Harper 2003). This  
312 forced benthic gastropods to develop heavily armoured shells and perhaps also to escape into  
313 the open water column, as was suggested for earlier geological periods (Signor & Vermeij  
314 1994, Teichert & Nützel 2015). Furthermore, during the mid-late Cretaceous major changes  
315 in ocean circulation, stratification and nutrient partitioning took place which were favorable  
316 for plankton evolution, in particular for planktonic calcifiers (Leckie et al. 2002).

317

318 Although the open ocean may have been a refuge for gastropods in the early Cretaceous, it is  
319 an increasingly challenging habitat to survive in during the Anthropocene. Planktonic  
320 gastropods have evolved thin, fragile shells of aragonite that are sensitive to ocean  
321 acidification, and most species live in surface waters where CO<sub>2</sub> is absorbed by the ocean.  
322 Incubation experiments with shelled pteropods mimicking future ocean conditions have  
323 shown that elevated pCO<sub>2</sub> and undersaturated aragonite conditions cause decreased  
324 calcification rates (Comeau et al. 2012), shell dissolution (Lischka et al. 2011), increased  
325 mortality (Bednaršek et al. 2017b; Thabet et al. 2015) and differential expression of genes  
326 involved in neurofunction, ion transport, and shell formation (Moya et al. 2016; Maas et al.  
327 2018). However, such experiments have primarily assessed phenotypic responses in short-  
328 term, single-generation studies, and thus cannot take into account the abilities of organisms to  
329 acclimate or adapt to changing conditions over longer timescales. The geological record,  
330 alternatively, can provide insight into long-term evidence of ocean acidification and the  
331 associated responses of marine calcifiers. However, the fossil record of pteropods appears far

332 from complete and hence, we need to rely on estimates of molecular divergence times to  
333 resolve the tempo and pattern of their evolution. The fact that pteropods have survived  
334 previous episodes of ocean acidification, such as during the PETM, does not, however, mean  
335 that they are infinitely resilient to current changes. Current rates of carbon release from  
336 anthropogenic sources are at least an order of magnitude higher than we have seen for the past  
337 66 million years (Zeebe et al. 2016). Although our results suggest resilience of pteropods to  
338 past ocean acidification, it is unlikely that they have ever, during their entire evolutionary  
339 history, experienced global change of the magnitude and speed that we see today.

340

#### 341 Acknowledgements

342

343 We appreciate the comments of J. Paps, D. Gavriouchkina and M. Malinsky on earlier  
344 versions of this manuscript. We acknowledge the Oxford Genomics Centre, Wellcome Trust  
345 Centre for Human Genetics, for performing the transcriptome sequencing. We would like to  
346 thank A.K. Burrige for collecting samples and T. Smythe, G. Tarran, and A. Rees for cruise  
347 leadership and support for participation in the AMT programme. This study contributes to the  
348 international IMBeR project and is contribution number 339 of the AMT programme.

349

#### 350 Funding

351

352 This research and KTCAP were supported by a Vidi grant 016.161351 from the Netherlands  
353 Organisation for Scientific Research (NWO), a Tera van Benthem Jutting grant from the  
354 Amsterdam University Fund and a KNAW ecology fund UPS/297/Eco/1403J. DWP received  
355 funding from the European Union's Horizon 2020 research and innovation programme under  
356 the Marie Skłodowska-Curie grant agreement No 746186 (POSEIDoN). EG was supported by  
357 National Science Foundation (USA) grants OCE-1338959 and OCE-1255697. FM was  
358 supported by internal funding of the Okinawa Institute of Science and Technology to the  
359 Molecular Genetics Unit. The Atlantic Meridional Transect is funded by the UK Natural  
360 Environment Research Council through its National Capability Long-term Single Centre  
361 Science Programme, Climate Linked Atlantic Sector Science (grant number NE/R015953/1).

362

#### 363 Author contributions

364

365 KTCAP conceived this study and obtained funding. KTCAP and EG collected and identified  
366 specimens at sea. KTCAP and FM carried out the labwork. FM led the data analyses. KTCAP  
367 and AWJ reviewed the fossil record and provided calibrations. KTCAP and FM drafted the  
368 manuscript, and all others commented.

369

370 Methods

371

372 **Sample collection.** Pteropod specimens were collected on Atlantic Meridional Transect  
373 (AMT) cruises 22 and 24 (2012, 2014), using 0.71m diameter bongo and RMT1 nets towed  
374 obliquely between a median of 305 m depth and the sea surface (200, 333  $\mu$ m nets; Table S1).  
375 Animals were sorted and identified live from bulk plankton, preserved in RNALater  
376 (Invitrogen) and flash frozen in liquid nitrogen, with storage at -80°C.

377

378 **Transcriptome sequencing and filtering.** RNA was extracted using RNAeasy micro or mini  
379 kits (Qiagen) after homogenisation with a TissueLyser (Qiagen). The number of individuals  
380 used for extraction varied from 1, in most cases, to 10 (Table S1). RNA quantity was  
381 determined by fluorimetry using a Qubit (Invitrogen) and RNA integrity was assessed using  
382 the Xperion system (Biorad). RNA-seq libraries were prepared using the TruSeq RNA  
383 Library preparation kit (Illumina) and between 12 and 33M paired-end reads per sample were  
384 sequenced for 100 cycles on a HiSeq2000 platform at the Wellcome Trust Centre for Human  
385 Genetics (Oxford). 2.3 to 6.6 Gb of DNA sequence data were obtained from each of 22  
386 samples, ensuring accurate *de novo* transcriptome assemblies (Table S2). Reads were  
387 deposited to the SRA under the bioproject accession XXXX. After quality assessment with  
388 Fastqc (Andrews 2010), reads were trimmed using sickle (Joshi 2011) and subsequently  
389 assembled using *Trinity* (v2.3.2) with default parameters and a k-mer of 25 (Grabherr et al.  
390 2011).

391

392 To avoid cross-contamination between samples sequenced on the same Illumina lanes  
393 (possibly due to index ‘hopping’), we applied a filtering procedure based on relative transcript  
394 expression across datasets, similar to the one implemented in Croco (Simion et al. 2018).  
395 Briefly, for the assembled transcriptome of each dataset, we measured expression level using  
396 Kallisto (v0.42.4) (Bray et al. 2016) in each of the multiple datasets sequenced  
397 simultaneously. We calculated the ratio of TPMs between the putatively contaminating  
398 datasets and the original dataset, and excluded transcripts with a contaminant enrichment  
399 greater than two-fold enrichment, and a minimal count lower than 2 in the original dataset.  
400 Across datasets, a median 6% of transcripts were excluded on the first criterion and a median  
401 26% on the second.

402

403 *De novo* assembled transcriptomes usually include a high degree of redundancy, as alternative  
404 transcripts derived from the same genes are distinguished in the assembly. As this might  
405 constitute a problem for orthology assignment, we clustered transcripts based on the fraction

406 of remapped reads that they share. To do so, we mapped reads from transcriptomes back to  
407 transcripts using Bowtie2 enabling up to 50 multi-mappers (-k 50) and processed the resulting  
408 alignments with Corset (v1.06) (Davidson and Oshlack 2014). Then, we estimated transcript  
409 expression using Kallisto (v0.43.1) (Bray et al. 2016) and we selected the most highly  
410 expressed transcript with each Corset cluster as a reference transcript for subsequent steps.  
411 The best open reading frame (ORF) for each of these selected transcripts was predicted using  
412 Trans-decoder (v5.0.2) using a blast against a version of swissprot limited to metazoan taxa  
413 (e-value  $10^{-5}$ ) (Haas et al. 2008).

414

415 **Phylogenetic analyses.** We conducted orthology inference using the OMA package (v2.3.0),  
416 which performs smith-waterman alignment and identifies orthologues based on evolutionary  
417 distance (Roth et al. 2008). We selected single-copy orthologues (OMA groups) represented  
418 by at least one of the three outgroup taxa (*Aplysia californica*, *Haminoea antillarum* or  
419 *Philine angasi*) and at least half of the 28 ingroup taxa. These cut-offs yielded 2654 single-  
420 copy orthologues suitable for phylogenetic analysis. For each orthologue family, protein  
421 sequences were aligned using Mafft and poorly aligned regions trimmed using Trimal  
422 (Capella-Gutiérrez et al. 2009) for sites with a gap in more than 75% of taxa (-gt 0.15) and  
423 applying a low minimum similarity threshold (-st 0.001). The concatenation of these 2654  
424 orthologous genes yields a supermatrix of 834,394 positions with a total fraction of 35.75%  
425 missing data. We performed Maximum-likelihood reconstruction with ExaML (v3.0.17)  
426 using a partitioned site-homogeneous model (one partition per orthologue) and a LG+ $\Gamma_4$   
427 model (Kozlov et al. 2015). Node support was calculated using 100 bootstrap replicates  
428 inferred with independently generated starting trees (Figure 1). To compare results with a  
429 site-heterogeneous model, we used Bayesian inference and a reduced dataset (because the  
430 complete dataset would be computationally intractable). We selected a subset of 200 genes  
431 which showed the maximal average bootstrap support when analysed independently (using  
432 RAxML v8.1.18, LG+ $\Gamma_4$  model and 100 rapid bootstraps) (Stamatakis 2014). The  
433 concatenation of these 200 genes generated a 108,008 amino acid alignment. This alignment  
434 was analysed using Phylobayes-MPI (v1.6) assuming a CAT+GTR+ $\Gamma_4$  model) with chains  
435 run for more than 1500 generations with 500 discarded as burnin. Chain convergence was  
436 checked and maxdiff found at 0 (Rodrigue & Lartillot 2014).

437

438 **Molecular divergence time inference.** We used Phylobayes (v4.1c) to infer molecular  
439 divergence times using the reduced 200 gene supermatrix and the topology from Figure 1  
440 (ML analysis) (Lartillot et al. 2009). We used the CAT+GTR+ $\Gamma_4$  model of sequence  
441 evolution and we assayed several clock models, the lognormal autocorrelated process (-ln),  
442 the CIR process and the uncorrelated gamma multiplier process, with a birth-death prior on

443 divergence time, and soft bounds on calibration points (Lepage et al. 2007). We applied 9  
444 calibration points with uniform priors based on the fossil records of pteropods (Table S3) and  
445 a root prior of 150 Myr with a standard deviation of 70 Myr. Using a 10-fold cross validation  
446 procedure, we found a best fit of the CIR process over log-normal and uncorrelated gamma  
447 processes (Figure 2 and Figure S2). The root prior was conservatively chosen based on the  
448 oldest known heterobranch (e.g. *Cylindrullina* dated 240 Ma, (Ponder & Lindberg 2008)) and  
449 *Akera* fossils (*Akera mediojurensis* and *Akera neocomiensis* dated at 163-166 Ma and 133  
450 Ma, respectively, Cossmann 1895a;b; Cossmann 1896). Broad deviations were used to  
451 account for the uncertainty of the fossil record. The consistency of the root prior was assessed  
452 by running chains without the data, which yielded a root age of  $154 \pm 32$  Myr.

453

#### 454 Data availability

455

456 Alignments and files generated during analyses including Bayesian sample and bootstrap  
457 replicates are available at the following address: XXXX.

458

#### 459 References

460

461 Andrews, S. 2010. FastQC: A Quality Control Tool for High Throughput Sequence Data.  
462 Babraham Bioinformatics, Babraham Institute, Cambridge, United Kingdom.

463

464 Bé, A.W.H., MacClintock, C. & Currie, D.C., 1972. Helical shell structure and growth of the  
465 pteropod *Cuvierina columnella* (Rang) (Mollusca, Gastropoda). *Biomineralization Res. Reps.*  
466 4:47-79.

467

468 Bé, A.W.H., Gilmer, R.W., 1977. A zoogeographic and taxonomic review of  
469 euthecosomatous Pteropoda. In: Ramsay, A.T.S. (Ed.), *Oceanic Micropalaeontology*.  
470 Academic Press, London, pp. 733–808.

471

472 Bednaršek, N. et al. 2012a. The global distribution of pteropods and their contribution to  
473 carbonate and carbon biomass in the modern ocean. *Earth System Science Data* 4, 167–186.

474

475 Bednaršek, N. et al. 2012b. Extensive dissolution of live pteropods in the Southern Ocean.  
476 *Nat. Geosci.* 5, 881–885.

477

478 Bednaršek, N. et al. 2017a. New ocean, new needs: application of pteropod shell dissolution  
479 as a biological indicator for marine resource management. *Ecol. Indicators* 76, 240-244.

480

481 Bednaršek, N. et al. 2017b. Exposure history determines pteropod vulnerability to ocean  
482 acidification along the US West Coast. *Nat. Commun.*, **7**, 1–12 (2017).

483

484 Berner, R.A. & Honjo, S. 1981. Pelagic sedimentation of aragonite - its geochemical  
485 significance. *Science* 211: 940-942.

486

487 Boas, J.E.V. 1886a. Spolia Atlantica. Bidrag til Peropodernes. Morfologi og systematik samt  
488 til Kundskaben om deres geografiske udbredelse. *K. danske Vidensk. Selsk. Skr.* 4: 1-231.

489

490 Bouchet, P. et al. 2017. Revised classification, nomenclator and typification of gastropod and  
491 monoplacophoran families. *Malacologia* 61: 1-526.

492

493 BouDagher-Fadel, M.K., 2015. Biostratigraphic and geological significance of planktonic  
494 foraminifera. UCL Press, University College London.

495

496 Bown, P. & Pearson, P. 2009. Calcareous plankton evolution and the Paleocene/Eocene  
497 Thermal Maximum event: New evidence from Tanzania, *Mar. Micropaleontol* 71:60–70.

498

499 Bray, N.L., Pimentel, H., Melsted, P. & Pachter, L. 2016. Near-Optimal Probabilistic RNA-  
500 Seq Quantification. *Nature Biotechnology* 34 (5): 525–27.

501

502 Buitenhuis, E. T., Le Quéré, C., Bednaršek, N. & Schiebel, R. 2019. Large contribution of  
503 pteropods to shallow CaCO<sub>3</sub> export. *Glob. Biogeochem. Cycles* 33: 458- 468.

504

505 BurrIDGE, A.K. et al. 2017. Time-calibrated molecular phylogeny of pteropods. *PlosONE*  
506 12(6): e0177325.

507

508 Capella-Gutiérrez, S., Silla-Martínez, J.M. & Gabaldón, T. 2009. TrimAl: A Tool for  
509 Automated Alignment Trimming in Large-Scale Phylogenetic Analyses. *Bioinformatics* 25  
510 (15): 1972–73.

511

512 Comeau, S., Gattuso, J.-P., Nisumaa, A.-M. & Orr, J. 2012. Impact of aragonite saturation  
513 state changes on migratory pteropods. *P. Roy. Soc. B-Biol. Sci.* **279**, 732–738.

514

515 Conover, R.J. & Lalli, C.M. 1972. Feeding and growth in *Clione limacina* (Phipps), a  
516 pteropod mollusc. *J. expl mar. Biol. Ecol.* 9:279-302.



517

518 Corse, E. et al. 2013. Phylogenetic analysis of Thecosomata Blainville, 1824 (Holoplanktonic  
519 Opisthobranchia) using morphological and molecular data. *PLoS ONE* 8(4):e59439.

520

521 Cossmann, M. 1895a. Essais de paléoconchologie comparée. Première livraison. Comptoir  
522 Géologique, Paris.

523

524 Cossmann, M. 1895b. Contribution à la paléontologie française des terrains jurassiques.  
525 Études sur les gasteropodes des terrains jurassiques. Mémoires de la Société Géologique de  
526 France. *Paléontologie* 14:1-165p

527

528 Curry, D. & Rampal, J. 1979. Shell microstructure in fossil thecosome pteropods.  
529 *Malacologia* 18:23-25.

530

531 Cuvier, G., 1804. Mémoire concernant l'animal de l'*Hyale*, un nouveau genre de mollusques  
532 nus, intermédiaire entre l'*Hyale* et la *Clio* et l'établissement d'un nouvel ordre dans la classe  
533 des mollusques. *Annls Mus. Hist. nat. Paris* 4: 223-34.

534

535 Davidson, N.M. & Oshlack, A. 2014. Corset: Enabling Differential Gene Expression Analysis  
536 for de Novo Assembled Transcriptomes. *Genome Biology* 15 (7): 410.

537

538 Dickens, G., Castillo, M.M. & Walker, J.C.G., 1997. A blast of gas in the latest Paleocene:  
539 simulating first-order effects of massive dissociation of oceanic methane hydrate. *Geology*  
540 25:259-262.

541

542 Garvie, C.L., Goedert, J.L. & Janssen, A. W. (in review). Paleogene and Late Cretaceous  
543 Pteropoda (Mollusca, Gastropoda, Heterobranchia) from North America. *Zootaxa*.

544

545 Gerhardt, S. & Henrich, R., 2001. Shell preservation of *Limacina inflata* (Pteropoda) in  
546 surface sediments from the Central and South Atlantic Ocean: a new proxy to determine the  
547 aragonite saturation state of water masses. *Deep-Sea Res. I* 48: 2051–2071.

548

549 Gibbs, S.J. et al. 2006. Nannoplankton extinction and origination across the Paleocene-  
550 Eocene Thermal Maximum. *Science* 314:1770-1773.

551

- 552 Gilmer, R.W. & Harbison, G.R. 1986. Morphology and field behaviour of pteropod molluscs:  
553 feeding methods in the families Cavoliniidae, Limacinidae and Peraclididae (Gastropoda:  
554 Thecosomata). *Mar. Biol.* 91: 47-57.  
555
- 556 Grabherr, M.G. et al. 2011. Full-Length Transcriptome Assembly from RNA-Seq Data  
557 without a Reference Genome. *Nature Biotechnology* 29 (7): 644–52.  
558
- 559 Haas, B.J. et al. 2008. Automated Eukaryotic Gene Structure Annotation Using  
560 EVIDENCEModeler and the Program to Assemble Spliced Alignments. *Genome Biology* 9 (1):  
561 R7.  
562
- 563 Harper, E.M. 2003. The Mesozoic marine revolution. Pp. 433-445 in: Patricia H. Kelley,  
564 Michał Kowalewski and Thor A. Hansen (eds). Predator-prey interactions in the fossil record.  
565 Topics in Geobiology, Vol. 20. New York, Kluwer.  
566
- 567 Hönisch, B., et al. 2012. The geological record of ocean acidification. *Science* 335: 1058-  
568 1063.  
569
- 570 Huber, G. 1993. On the cerebral nervous system of marine heterobranchia (Gastropoda). *J*  
571 *Molluscan Stud.* 59:381-420.  
572
- 573 Hunt, B.P.V. et al. 2008. Pteropods in Southern Ocean ecosystems. *Prog. Oceanogr.* 78, 193-  
574 221.  
575
- 576 Irisarri, I. et al. 2017. Phylotranscriptomic consolidation of the jawed vertebrate timetree.  
577 *Nature Ecology and Evolution* 1:1370-1378.  
578
- 579 Jablonski, D. 1994. Extinctions in the fossil record. *Phil. Trans. Roy. Soc. B* 344:11-17.  
580
- 581 Jägersten, G. 1972. Evolution of the Metazoan life cycle. New York, Academic Press. 282 pp.  
582
- 583 Janssen, A.W. 2012. Late Quaternary to Recent holoplanktonic Mollusca (Gastropoda) from  
584 bottom samples of the eastern Mediterranean Sea: systematics, morphology. *Bollettino*  
585 *Malacologico* 48:1–105.  
586

- 587 Janssen, A.W. & Goedert, J.L. 2016. Notes on the systematics, morphology and  
588 biostratigraphy of fossil holoplanktonic Mollusca, 24. First observation of a genuinely Late  
589 Mesozoic thecosomatous pteropod. *Basteria* 80, 59-63.  
590
- 591 Janssen, A.W., Sessa, J. & Thomas, E., 2016. Pteropoda (Mollusca, Gastropoda,  
592 Thecosomata) from the Paleocene-Eocene Thermal Maximum (United States Atlantic Coastal  
593 Plain). *Palaeontologia Electronica*, 19.3.47A: 1-26.  
594
- 595 Janssen, A.W. & Peijnenburg, K.T.C.A. 2017. An overview of the fossil record of Pteropoda  
596 (Mollusca, Gastropoda, Heterobranchia). *Cainozoic Research* 17: 3-10.  
597
- 598 Jennings, R.M., Bucklin, A., Ossenbrügger H. & Hopcroft R.R. 2010. Species diversity of  
599 planktonic gastropods (Pteropoda and Heteropoda) from six ocean regions based on DNA  
600 barcode analysis. *Deep-Sea Res II* 57: 2199–2010.  
601
- 602 Joshi, N.A., & Fass, J.N. 2011. Sickle: A Sliding-Window, Adaptive, Quality-Based  
603 Trimming Tool for FastQ Files. 2011. <https://github.com/najoshi/sickle>.  
604
- 605 Kelly, D. C. et al. 1996. Rapid diversification of planktonic foraminifera in the tropical  
606 Pacific (ODP Site 865) during the Late Paleocene Thermal Maximum, *Geology* 24: 423–426.  
607
- 608 Kennett, J.P. & Stott, L.D. 1991. Abrupt deep-sea warming, palaeoceanographic changes and  
609 benthic extinctions at the end of the Paleocene. *Nature* 353: 225-229.  
610
- 611 Keul, N. et al. 2017. Pteropods are excellent recorders of surface temperature and carbonate  
612 ion concentration. *Scientific Reports* 7: 12645.  
613
- 614 Klusmann-Kolb, A. & Dinapoli, A. 2006. Systematic position of the pelagic Thecosomata  
615 and Gymnosomata within Opisthobranchia (Mollusca, Gastropoda) – revival of the  
616 Pteropoda. *Journal of Zoological Systematics and Evolutionary Research* 44(2):118–129.  
617
- 618 Kozlov, A.M., Aberer, A.J. & Stamatakis, A. 2015. ExaML Version 3: A Tool for  
619 Phylogenomic Analyses on Supercomputers. *Bioinformatics* 31 (15): 2577–79.  
620
- 621 Lalli, C.M. 1970. Structure and function of the buccal apparatus of *Clione limacina* (Phipps)  
622 with a review of feeding in gymnosomatous pteropods. *J. expl mar. Biol. Ecol.* 4:101-118.  
623

- 624 Lalli, C.M. & Gilmer, R.W. 1989. Pelagic Snails: The Biology of Holoplanktonic Gastropod  
625 Molluscs. Stanford University Press, California.  
626
- 627 Lartillot, N., Lepage, T. & Blanquart, S. 2009. PhyloBayes 3: A Bayesian Software Package  
628 for Phylogenetic Reconstruction and Molecular Dating. *Bioinformatics* 25 (17): 2286–88.  
629
- 630 Leckie, R.M., Bralower, T.J. & Cashman, R. 2002. Oceanic anoxic events and plankton  
631 evolution: biotic response to tectonic forcing during the Cretaceous. *Paleoceanography* 17:1-  
632 29.  
633
- 634 Lemche, H. 1948. Northern and Arctic tectibranch gastropods. I/II. K. danske Vidensk. Selsk.  
635 Skr. 5:1-136.  
636
- 637 Lepage, T., Bryant, D., Philippe, H. & Lartillot, N. 2007. A General Comparison of Relaxed  
638 Molecular Clock Models. *Molecular Biology and Evolution* 24 (12): 2669–80.  
639
- 640 Li, L., Weaver, J.C. & Ortiz, C. 2015. Hierarchical structural design for fracture resistance in  
641 the shell of the pteropod *Clio pyramidata*. *Nature Communications* 6:6216.  
642
- 643 Lischka, S., Büdenbender, J., Boxhammer, T. & Riebesell, U. 2011. Impact of ocean  
644 acidification and elevated temperatures on early juveniles of the polar shelled pteropod  
645 *Limacina helicina*: mortality, shell degradation, and shell growth. *Biogeosciences* 8: 919–932.  
646
- 647 Luo, Y. et al. 2016. An alternative model for CaCO<sub>3</sub> over-shooting during the PETM:  
648 biological carbonate compensation. *Earth and Planetary Science Letters* 453:223-233.  
649
- 650 Maas, A.E., Lawson, G.L. & Wang, Z.A. 2016. The metabolic response of thecosome  
651 pteropods from the North Atlantic and North Pacific Oceans to high CO<sub>2</sub> and low O<sub>2</sub>.  
652 *Biogeosci. Discuss.* 1–43.  
653
- 654 Maas, A.E., Lawson, G.L., Bergan, A.J. & Tarrant, A.M. 2018. Exposure to CO<sub>2</sub> influences  
655 metabolism, calcification and gene expression of the thecosome pteropod *Limacina*  
656 *retroversa*. *Journal of Experimental Biology* 221:1-13.  
657

- 658 Maas, A. E., Lawson, G. L., Bergan, A. J., Wang, Z. A. & Tarrant, A. M. in review. Seasonal  
659 variation in physiology and shell condition of the pteropod *Limacina retroversa* in the Gulf of  
660 Maine relative to life cycle and carbonate chemistry. *Progress in Oceanography*.  
661
- 662 Manno, C. et al. 2017. Shelled pteropods in peril: assessing vulnerability in a high CO<sub>2</sub> ocean.  
663 *Earth-Science Rev.* 169: 132–145.  
664
- 665 Manno, C. et al. 2018. Threatened species drive the strength of the carbonate pump in the  
666 northern Scotia Sea. *Nature Communications* 9:4592.  
667
- 668 Marin, F. et al. 2018. Skeletal organic matrices in molluscs: origin, evolution, diagenesis.  
669 *Biom mineralization* 325-332.  
670
- 671 Moya, A. et al. 2016. Near-future pH conditions severely impact calcification, metabolism  
672 and the nervous system in the pteropod *Heliconoides inflatus*. *Glob. Change Biol.* 22, 3888–  
673 3900.  
674
- 675 Mucci, A. 1983. The solubility of calcite and aragonite in seawater at various salinities,  
676 temperatures, and one atmosphere total pressure. *Am J Sci* 283:780–799  
677
- 678 Peters, S.E., Kelly, D.C. & Fraass, A.J. 2013. Oceanographic controls on the diversity and  
679 extinction of planktonic foraminifera. *Nature* 493: 398-401.  
680
- 681 Penman, D.E. et al. 2014. Rapid and sustained surface ocean acidification during the  
682 Paleocene-Eocene Thermal Maximum. *Paleoceanography* 29:357-369.  
683
- 684 Ponder, W. & Lindberg, D.R. 2008. Phylogeny and Evolution of the Mollusca. University of  
685 California Press.  
686
- 687 Raffi, I., Backman, J., Zachos, J.C. & Sluijs, A. 2009. The response of calcareous nannofossil  
688 assemblages to the Paleocene Eocene Thermal Maximum at the Walvis Ridge in the South  
689 Atlantic. *Mar. Micropaleontol.* 70: 201–212.  
690
- 691 Rodrigue, N. & Lartillot, N. 2014. Site-Heterogeneous Mutation-Selection Models within the  
692 PhyloBayes-MPI Package. *Bioinformatics* 30 (7): 1020–21.  
693

- 694 Roth, A.C.J., Gonnet, G.H. & Dessimoz, C. 2008. Algorithm of OMA for Large-Scale  
695 Orthology Inference. *BMC Bioinformatics* 9 (1): 1.  
696
- 697 Schmidt, D.N. et al. 2018. Strategies in times of crisis - insights into the benthic foraminiferal  
698 record of the Palaeocene-Eocene Thermal Maximum. *Philosophical Transactions of the*  
699 *Royal Society A* 376:20170328.  
700
- 701 Schulte, P., et al. 2010. The Chicxulub asteroid impact and mass extinction at the Cretaceous-  
702 Paleogene boundary. *Science* 307: 1214-1218.  
703
- 704 Signor, P.W. & Vermeij, G.J. 1994. The plankton and the benthod: origins and early history  
705 of an evolving relationship. *Paleobiology* 20:297-319.  
706
- 707 Simion, P. et al. 2018. A Software Tool ‘CroCo’ Detects Pervasive Cross-Species  
708 Contamination in next Generation Sequencing Data. *BMC Biology* 16 (1): 28.  
709
- 710 Smit, J. & J. Hertogen, 1980. An extraterrestrial event at the Cretaceous-Tertiary boundary.  
711 *Nature* 285:198-200.  
712
- 713 Stamatakis, A. 2014. RAxML Version 8: A Tool for Phylogenetic Analysis and Post-Analysis  
714 of Large Phylogenies. *Bioinformatics* 30 (9): 1312–13.  
715
- 716 Sun, W. et al. 2015. Nucleation of metastable aragonite CaCO<sub>3</sub> in seawater. Proceedings of  
717 the National Academy of Sciences 112: 3199-3204.  
718
- 719 Tajika, A., Nützel A. & Klug C. 2018. The old and the new plankton: ecological replacement  
720 of associations of mollusc plankton and giant filter feeders after the Cretaceous? *PeerJ*  
721 6:e4219; DOI 10.7717/peerj.4219  
722
- 723 Tanner, A.R. et al. 2017. Molecular clocks indicate turnover and diversification of modern  
724 coleoid cephalods during the Mesozoic Marine Revolution. *Proceedings of the Royal Society*  
725 *B* 284:20162818.  
726
- 727 Teichert, S. & Nützel A. 2015. Early Jurassic anoxia triggered the evolution of the oldest  
728 holoplanktonic gastropod *Coelodiscus minutus* by means of heterochrony. *Acta*  
729 *Palaeontologica Polonica* 60: 269-276.  
730



- 731 Thabet, A. A., Maas, A.E., Lawson, G.L. & Tarrant, A.M.. 2015. Life cycle and early  
732 development of the thecosomatous pteropod *Limacina retroversa* in the Gulf of Maine,  
733 including the effect of elevated CO<sub>2</sub> levels. *Marine Biology* 162: 2235-2249.  
734
- 735 Valdes, A. & Lozouet, P. 2000. Opisthobranch molluscs from the Tertiary of the Aquitaine  
736 Basin (South-Western France), with descriptions of seven new species and a new genus.  
737 *Palaeontology* 43:457-479.  
738
- 739 Van der Spoel, S. & Dadon, J.R. 1999. Pteropoda. In: Boltovskoy D. (Ed.), South Atlantic  
740 Zooplankton. Backhuys Publishers, Leiden, pp. 649-706.  
741
- 742 Vermeij, G. 1977. The Mesozoic marine revolution: evidence from snails, predators and  
743 grazers. *Paleobiology* 3:245-258.  
744
- 745 Wall-Palmer, D. et al. 2012. Pteropods from the Caribbean Sea: variations in calcification as  
746 an indicator of past ocean carbonate saturation. *Biogeosciences* 9, 309-315.  
747
- 748 Yacobucci, M.M. 2015. Macroevolution and paleobiogeography of Jurassic-Cretaceous  
749 ammonoids. Pp. 189-228 in: C. Klug, D. Korn, K. De Baets, I. Kruta, and R.H. Mapes (eds.).  
750 Ammonoid Paleobiology: from Macroevolution to Paleogeography. Topics in Geobiology,  
751 Vol. 44. Dordrecht, Springer.  
752
- 753 Zachos, J.C. et al. 2005. Rapid acidification of the ocean during the Paleocene-Eocene  
754 Thermal Maximum. *Science* 308: 1611-1615.  
755
- 756 Zapata, F. et al. 2014. Phylogenomic analyses of deep gastropod relationships reject  
757 Orthogastropoda. *Proceedings of the Royal Society B* 281:20141739.  
758
- 759 Zeebe, R.E., Ridgwell, A. & Zachos, J.C. 2016. Anthropogenic carbon release rate  
760 unprecedented during the past 66 million years. *Nature Geoscience* 9:325-329.

## Figures

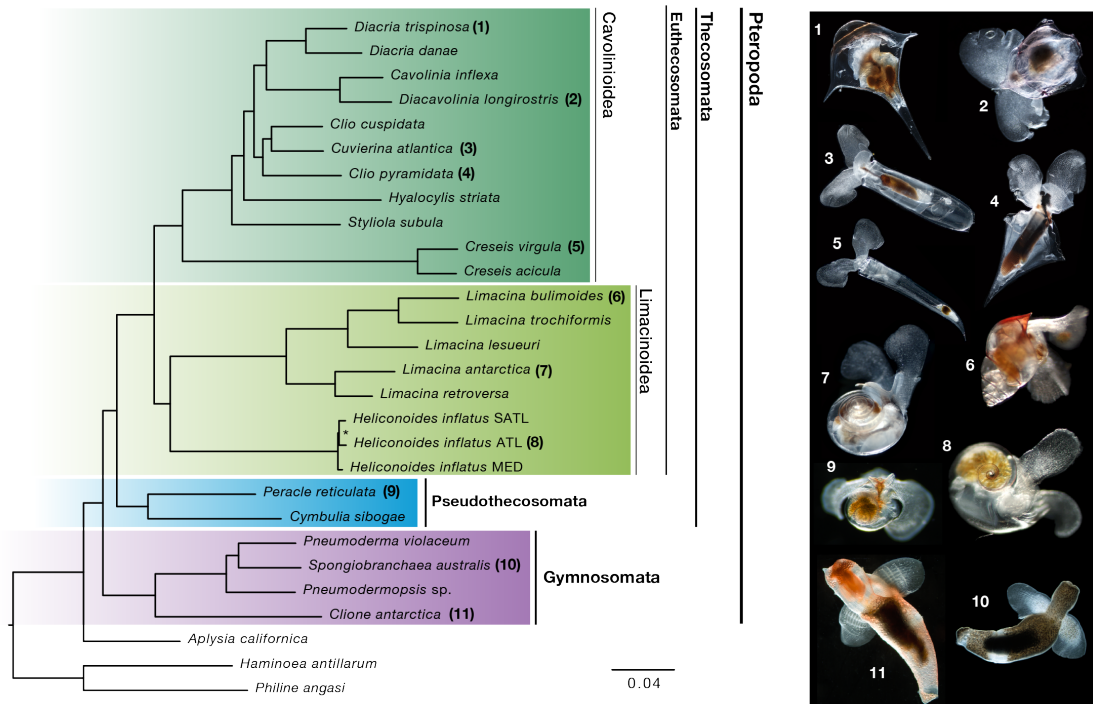

**Figure 1. Phylogenomics resolves evolutionary relationships of pteropods.** Euthecosomes (fully shelled species) and pseudothecosomes (ranging from fully shelled to unshelled species) are recovered as sister clades for the first time in a molecular analysis restoring the Thecosomata ('sea butterflies') as a natural group. Thecosomata and Gymnosomata ('sea angels') are monophyletic sister clades congruent with traditional morphology-based views. The superfamilies Cavolinioidae with uncoiled shells and Limacinoidea with coiled shells are also recovered as monophyletic sister clades.

Maximum Likelihood phylogeny of 25 pteropod taxa, plus 3 outgroups assuming a LG+Γ model. The dataset comprises 2654 genes, concatenated as 834,394 amino acid positions with 35.8% missing data. A nearly identical topology is obtained modelled under CAT-GTR+Γ with a reduced dataset of 200 genes (Figure S1). Higher taxonomic divisions are indicated. All nodes receive maximal bootstrap support, except the node with an asterisk (bootstrap 95%). On the right are images of living pteropod species (numbers correspond with taxon labels, not to scale) collected and photographed by the authors. Scale bar indicates substitutions per site.

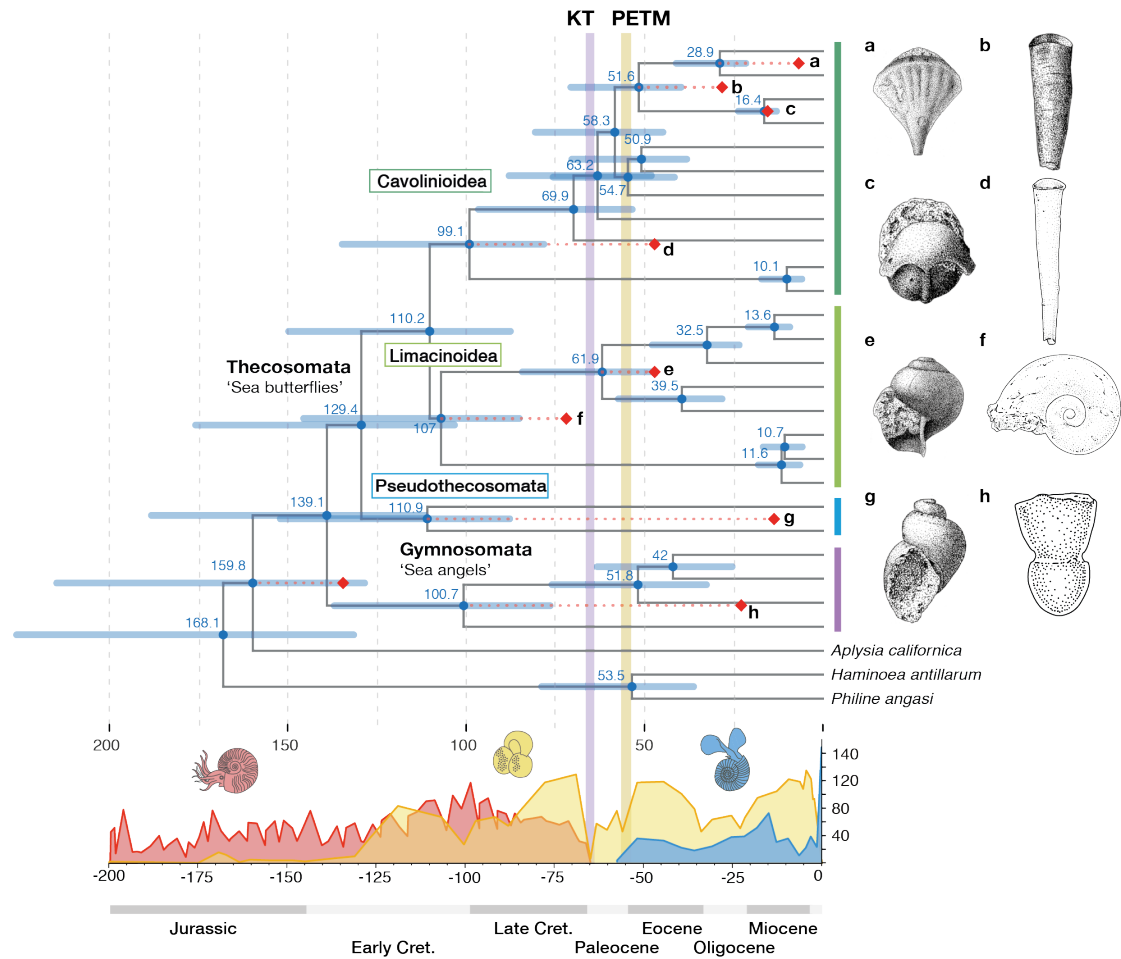

**Figure 2. All major lineages of pteropods diverged in the Cretaceous and thus must have survived previous major global change events.** Chronogram of pteropods (25 taxa and 3 outgroups) based on 200 genes, concatenated as 108,008 amino acid positions, analysed under a CAT-GTR+ $\Gamma$  evolutionary model and CIR relaxed clock model. Red diamonds indicate fossil-calibrated nodes (see Table S3) with red dotted lines to show divergence from minimum ages of the fossils. Two major global change events are indicated as KT (Cretaceous-Tertiary asteroid impact, 66 Ma) and PETM (Paleocene Eocene Thermal Maximum, ~56 Ma). Curves for ammonite (red), planktonic foraminifer (yellow), and pteropod (blue) species diversity through time are based on sediment records from Yacobucci (2015), Boudagher-Fadel (2015), and our own data base (available from the authors on request), respectively.

Drawings of fossil species used for calibrations correspond to nodes a: *Diacria sangiorgii* (7.2 Ma), b: *Vaginella gaasensis* (28.1 Ma), c: *Cavolinia microbesitas* (16 Ma), d: *Euchilotheca ganensis* (47.8 Ma), e: *Limacina gormanii* (47.8 Ma), f: *Heliconoides sp.* (72.1 Ma), g: *Peracle amberae* (16 Ma), and h: *Clione ? imdinaensis* (23 Ma). The oldest outgroup calibration is *Akera neocomiensis* (133 Ma, no drawing available).

## Supplementary Figures

### Figure S1. Phylogenomics resolves evolutionary relationships of pteropods.

Euthecosomes (fully shelled species, green) and pseudothecosomes (ranging from fully shelled to unshelled species, blue) are recovered as sister clades for the first time in a molecular analysis restoring the Thecosomata ('sea butterflies') as a natural group. Thecosomata and Gymnosomata ('sea angels', purple) are monophyletic sister clades congruent with traditional morphology-based views. The superfamilies Cavolinioidae with uncoiled shells and Limacinoidea with coiled shells are also recovered as monophyletic sister clades.

Bayesian phylogeny of 25 pteropod taxa, plus 3 outgroups assuming a CAT+GTR+ $\Gamma_4$  model using Phylobayes-MPI. The dataset was comprised of 200 selected genes (see Methods), concatenated as 108,008 amino acid positions. All nodes received maximal posterior probabilities.

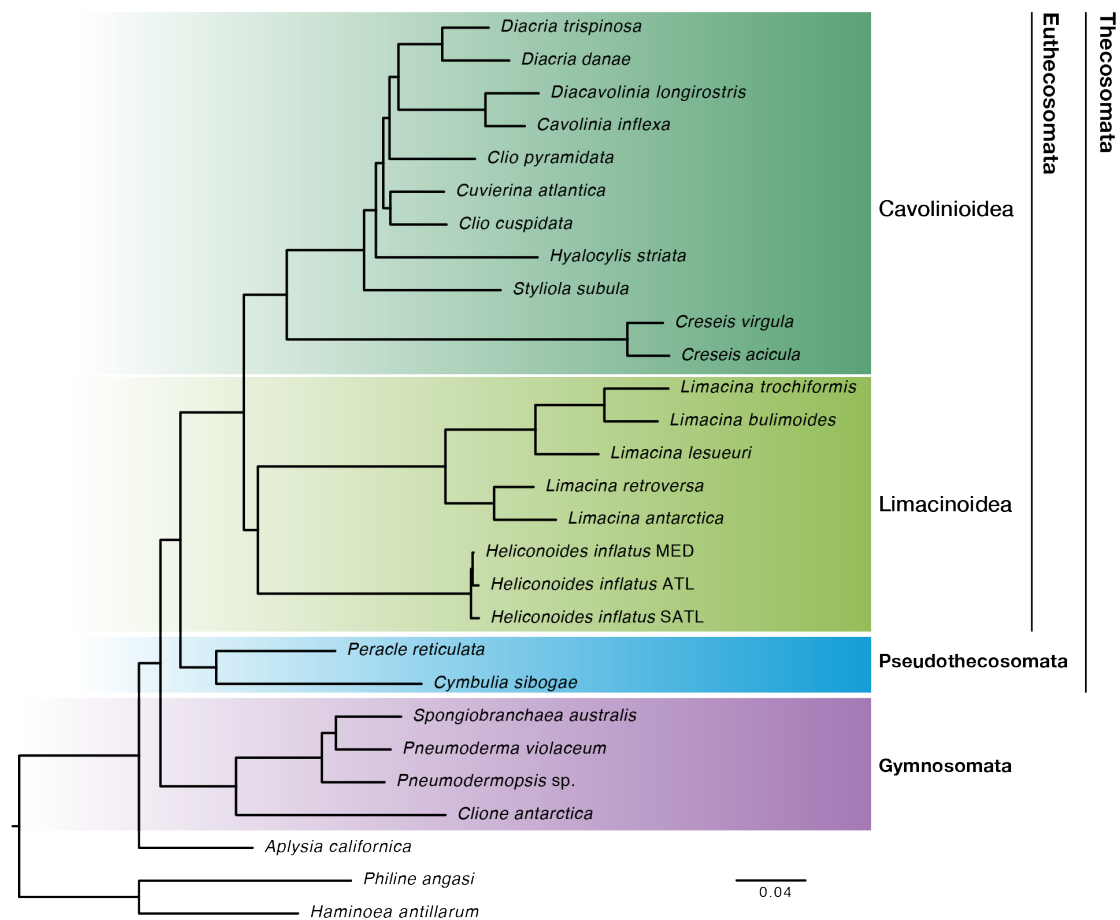

**Figure S2. Divergence times for major pteropod clades under different clock models were not markedly different.** Bayesian phylogenies to infer molecular divergence times using the reduced 200 genes supermatrix, the topology of Figure 1 and a CAT+GTR+ $\Gamma_4$  model of sequence evolution (see Methods) with three different clock models: the CIR process (CIR, see also Figure 2), the lognormal autocorrelated process (Log-normal), and the uncorrelated gamma multiplier process (UGAM).

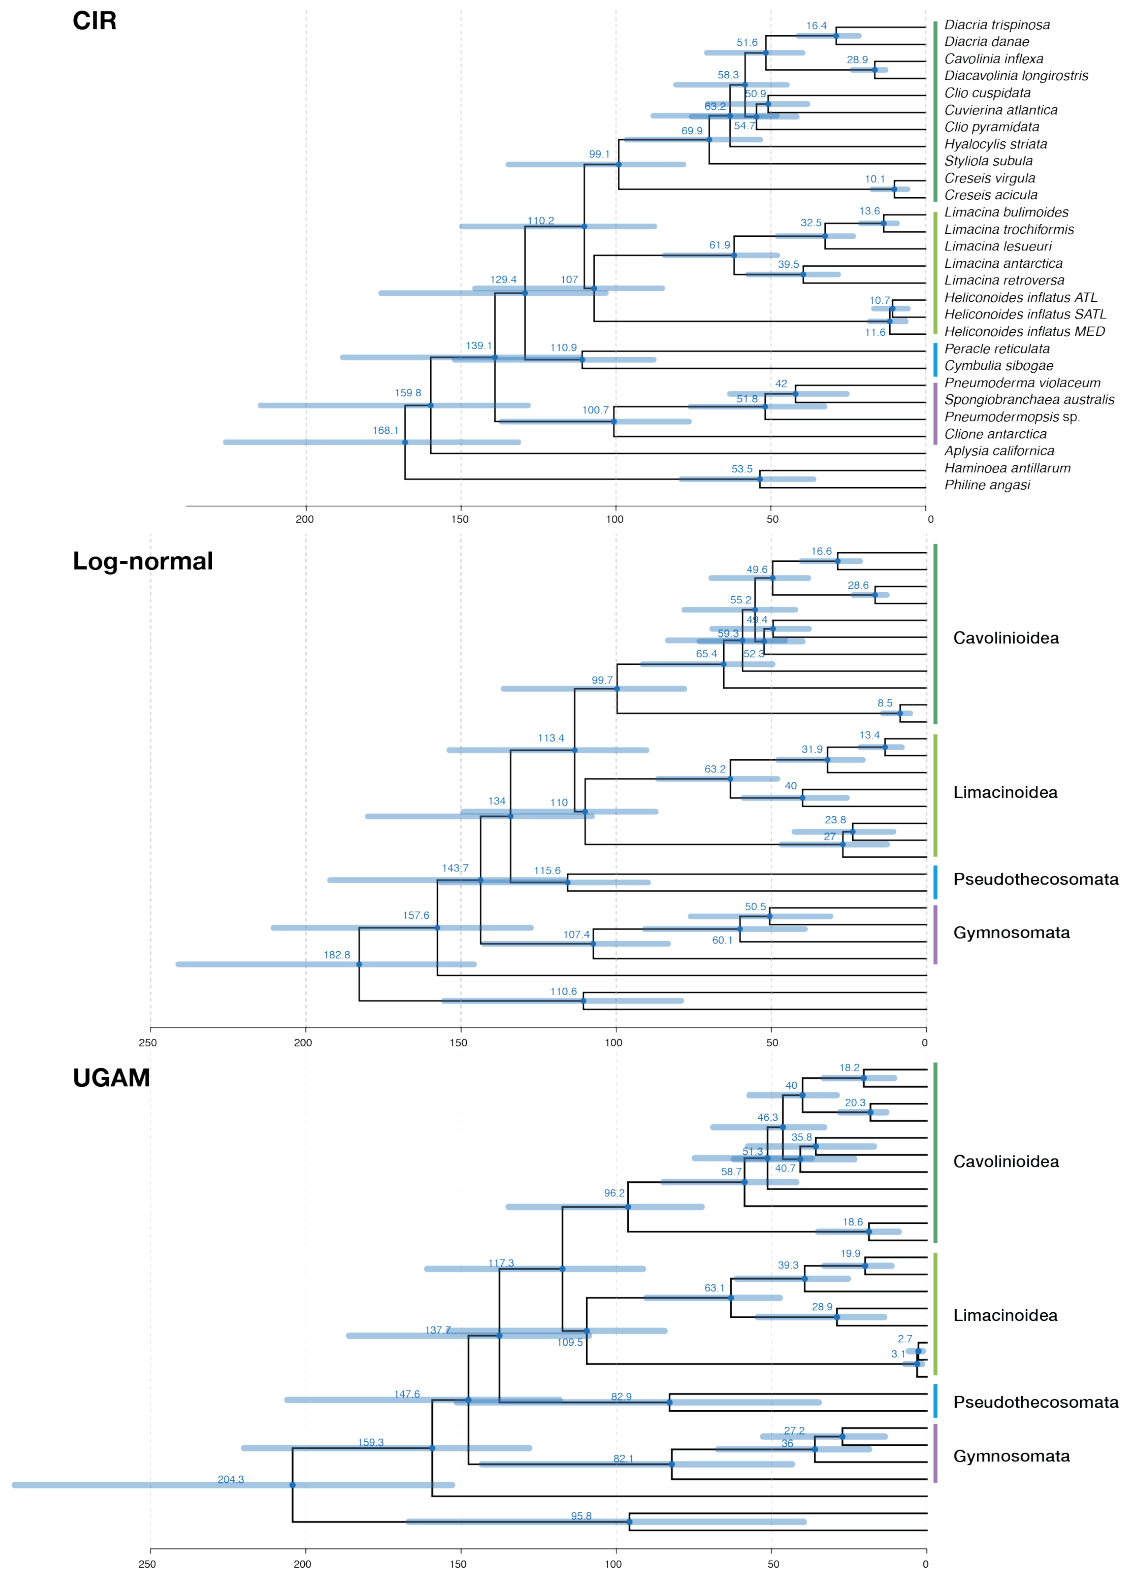

Supplementary tables

**Table S1.** Sampling details of pteropod taxa for which new transcriptome data were collected.

| Species                              | Taxonomic group   | Latitude   | Longitude    | Collection date | Max depth of sample (m) | Net type, mesh size | number of individuals used in RNAextraction |
|--------------------------------------|-------------------|------------|--------------|-----------------|-------------------------|---------------------|---------------------------------------------|
| <i>Cavolinia inflexa</i>             | Euthecosomata     | 30° 35.9 S | 25° 48.3 W   | 22/10/14        | 163                     | Bongo, 200µm        | 2                                           |
| <i>Clio cuspidata</i>                | Euthecosomata     | 39° 24.6 N | 22° 28.6 W   | 01/10/14        | 274                     | Bongo, 200µm        | 1                                           |
| <i>Clio pyramidata</i>               | Euthecosomata     | 18° 19.9 N | 28° 48.5 W   | 07/10/14        | 91                      | Bongo, 200µm        | 1                                           |
| <i>Creseis acicula</i>               | Euthecosomata     | 20° 51.3 S | 25° 04.7 W   | 20/10/14        | 309                     | Bongo, 200µm        | 3                                           |
| <i>Creseis virgula</i>               | Euthecosomata     | 18° 19.9 N | 28° 48.5 W   | 07/10/14        | 91                      | Bongo, 200µm        | 3                                           |
| <i>Cuvierina atlantica</i>           | Euthecosomata     | 28° 21.7 S | 25° 27.3 W   | 11/11/12        | 301                     | Bongo, 333µm        | 1                                           |
| <i>Cymbulia sibogae</i>              | Pseudothecosomata | 11° 22.2 N | 27° 19.9 W   | 09/10/14        | 70                      | Bongo, 200µm        | 1                                           |
| <i>Diacavolinia longirostris</i>     | Euthecosomata     | 6° 37.1 N  | 28° 19.0 W   | 29/10/12        | 404                     | Bongo, 333µm        | 1                                           |
| <i>Diacria danae</i>                 | Euthecosomata     | 24° 27.4 S | 25° 02.5 W   | 21/10/14        | 323                     | Bongo, 200µm        | 2                                           |
| <i>Diacria trispinosa</i>            | Euthecosomata     | 24° 03.4 N | 29° 54.5 W   | 06/10/14        | 258                     | Bongo, 200µm        | 1                                           |
| <i>Heliconoides inflatus</i> (ATL)   | Euthecosomata     | 4° 03.0 N  | 26° 27.8 W   | 30/10/12        | 388                     | Bongo, 333µm        | 10                                          |
| <i>Heliconoides inflatus</i> (S ATL) | Euthecosomata     | 37° 53.6 S | 28° 44.2 W   | 25/10/14        | 372                     | Bongo, 200µm        | 6                                           |
| <i>Hyalocylis striata</i>            | Euthecosomata     | 7° 17.1 N  | 26° 29.5 W   | 11/10/14        | 329                     | Bongo, 200µm        | 1                                           |
| <i>Limacina antarctica</i>           | Euthecosomata     | 44° 37.4 S | 40° 41.5 W   | 29/10/14        | 350                     | Bongo, 200µm        | 5                                           |
| <i>Limacina bulimoides</i>           | Euthecosomata     | 24° 27.4 S | 25° 02.5 W   | 21/10/14        | 323                     | Bongo, 200µm        | 5                                           |
| <i>Limacina lesueuri</i>             | Euthecosomata     | 14° 12.4 N | 27° 55.7 W   | 09/10/14        | 305                     | Bongo, 200µm        | 4                                           |
| <i>Limacina trochiformis</i>         | Euthecosomata     | 25° 29.1 S | 25° 00.0 W   | 09/11/12        | 153                     | RMT1, 333µm         | 1                                           |
| <i>Peraclis reticulata</i>           | Pseudothecosomata | 14° 12.4 N | 27° 55.7 W   | 09/10/14        | 305                     | Bongo, 200µm        | 3                                           |
| <i>Pneumoderma violaceum</i>         | Gymnosomata       | 10° 46.8 N | 27° 12.4 W   | 10/10/14        | 323                     | Bongo, 200µm        | 1                                           |
| <i>Pneumodermopsis</i> sp.           | Gymnosomata       | 31° 20.4 S | 26° 06.0 W   | 23/10/14        | 330                     | Bongo, 200µm        | 1                                           |
| <i>Spongiobranchea australis</i>     | Gymnosomata       | 41° 28.6 S | 33° 51.5 W   | 27/10/14        | 228                     | Bongo, 200µm        | 1                                           |
| <i>Styliola subula</i>               | Euthecosomata     | 30° 35.9 S | 25° 48.311 W | 22/10/14        | 163                     | Bongo, 200µm        | 2                                           |



**Table S2.** Details of 28 transcriptome datasets used in phylogenomic analyses. N\_reads is the number of sequenced paired-end reads, N\_pept is the number of predicted peptides among transcripts. N\_OG is the number of selected single-copy orthologues recovered for this species. P\_miss\_OG is the percentage of missing single-copy orthologues for the taxon, P\_gaps is the fraction of gaps and P\_miss\_tot is the total fraction of missing data in the alignment for the taxon (gaps and missing genes).

| Species                              | Order         | Taxonomic group   | accession          | N_reads  | N_pept | N_OG | P_miss_OG | P_gaps | P_miss_tot |
|--------------------------------------|---------------|-------------------|--------------------|----------|--------|------|-----------|--------|------------|
| <i>Aplysia californica</i>           | Aplysiida     | Outgroup          | ftp.broadinstitute | -        | 92469  | 2616 | 1.09      | 1.6    | 2.69       |
| <i>Cavolinia inflexa</i>             | Pteropoda     | Euthecosomata     | SRRXXXXX           | 14107853 | 20521  | 1729 | 35.51     | 2.17   | 37.68      |
| <i>Clio cuspidata</i>                | Pteropoda     | Euthecosomata     | SRRXXXXX           | 15473224 | 21307  | 1222 | 56        | 1.05   | 57.05      |
| <i>Clio pyramidata</i>               | Pteropoda     | Euthecosomata     | SRRXXXXX           | 15596539 | 24705  | 1665 | 39.3      | 2.12   | 41.42      |
| <i>Clione antarctica</i>             | Pteropoda     | Gymnosomata       | SRR1505107         | 20282761 | 19813  | 1915 | 29.53     | 2.62   | 32.16      |
| <i>Pneumodermopsis</i> sp.           | Pteropoda     | Gymnosomata       | SRRXXXXX           | 18094803 | 18984  | 1396 | 51.35     | 1.24   | 52.59      |
| <i>Creseis acicula</i>               | Pteropoda     | Euthecosomata     | SRRXXXXX           | 12027779 | 27003  | 1806 | 33.19     | 2.82   | 36.01      |
| <i>Creseis virgula</i>               | Pteropoda     | Euthecosomata     | SRRXXXXX           | 14105581 | 26726  | 1824 | 34.12     | 3.06   | 37.18      |
| <i>Cuvierina atlantica</i>           | Pteropoda     | Euthecosomata     | SRRXXXXX           | 28558114 | 20994  | 1966 | 28.34     | 2.99   | 31.33      |
| <i>Cymbulia sibogae</i>              | Pteropoda     | Pseudothecosomata | SRRXXXXX           | 13430464 | 14494  | 1166 | 57.8      | 1.83   | 59.63      |
| <i>Diacavolinia longirostris</i>     | Pteropoda     | Euthecosomata     | SRRXXXXX           | 14469630 | 21220  | 1582 | 44.76     | 2.22   | 46.98      |
| <i>Diacria danae</i>                 | Pteropoda     | Euthecosomata     | SRRXXXXX           | 25218341 | 36533  | 1673 | 38.09     | 1.23   | 39.32      |
| <i>Diacria trispinosa</i>            | Pteropoda     | Euthecosomata     | SRRXXXXX           | 13123731 | 16800  | 682  | 76.48     | 0.87   | 77.36      |
| <i>Haminoea antillarum</i>           | Cephalaspidea | Outgroup          | SRR1505111         | -        | 39489  | 1821 | 35.68     | 5.68   | 41.36      |
| <i>Heliconoides inflatus</i> (ATL)   | Pteropoda     | Euthecosomata     | SRRXXXXX           | 33421222 | 20283  | 1109 | 66.97     | 2.08   | 69.05      |
| <i>Heliconoides inflatus</i> (S ATL) | Pteropoda     | Euthecosomata     | SRRXXXXX           | 18330623 | 33123  | 1925 | 29.03     | 2.73   | 31.76      |
| <i>Heliconoides inflatus</i> (MED)   | Pteropoda     | Euthecosomata     | PRJNA312154        | -        | 25016  | 2434 | 7.83      | 2.2    | 10.03      |
| <i>Hyalocylis striata</i>            | Pteropoda     | Euthecosomata     | SRRXXXXX           | 20300621 | 33352  | 2360 | 10.42     | 2.23   | 12.65      |
| <i>Limacina bulimoides</i>           | Pteropoda     | Euthecosomata     | SRRXXXXX           | 18046287 | 28764  | 1799 | 34.54     | 2.81   | 37.35      |
| <i>Limacina antarctica</i>           | Pteropoda     | Euthecosomata     | SRRXXXXX           | 19486196 | 28954  | 2221 | 15.92     | 2.07   | 17.99      |
| <i>Limacina lesueuri</i>             | Pteropoda     | Euthecosomata     | SRRXXXXX           | 14648179 | 24430  | 1793 | 33.53     | 2.1    | 35.64      |
| <i>Limacina retroversa</i>           | Pteropoda     | Euthecosomata     | PRJNA260534        | -        | 40077  | 2376 | 10.62     | 2.53   | 13.15      |
| <i>Limacina trochiformis</i>         | Pteropoda     | Euthecosomata     | SRRXXXXX           | 14412701 | 35829  | 2004 | 25.99     | 2.75   | 28.74      |
| <i>Peracle reticulata</i>            | Pteropoda     | Pseudothecosomata | SRRXXXXX           | 17876973 | 27998  | 1776 | 35.18     | 2.43   | 37.61      |
| <i>Philine angasi</i>                | Cephalaspidea | Outgroup          | SRR1505129         | 11881480 | 33219  | 2037 | 23.05     | 5.81   | 28.87      |

|                                   |           |               |          |          |       |      |       |      |       |
|-----------------------------------|-----------|---------------|----------|----------|-------|------|-------|------|-------|
| <i>Pneumoderma violaceum</i>      | Pteropoda | Gymnosomata   | SRRXXXXX | 16362957 | 24989 | 2148 | 17.78 | 2.21 | 19.99 |
| <i>Spongiobranchaea australis</i> | Pteropoda | Gymnosomata   | SRRXXXXX | 18191206 | 20998 | 1621 | 40.7  | 1.66 | 42.36 |
| <i>Styliola subula</i>            | Pteropoda | Euthecosomata | SRRXXXXX | 16115592 | 29755 | 2062 | 20.76 | 2.33 | 23.09 |

**Table S3.** Nine fossil calibrations used in the molecular clock analyses. Letters refer to nodes labelled a-i in the chronogram of Figure 2.

| Calibrated node                          | Fossil species                | Epoch: stage                    | Minimum age (Ma) | Reference              |
|------------------------------------------|-------------------------------|---------------------------------|------------------|------------------------|
| a: <i>Diacria</i>                        | <i>Diacria sangiorgii</i>     | Miocene: Tortonian              | 7.2              | Scarsella 1934         |
| b: <i>Cavolinia+Diacavolinia+Diacria</i> | <i>Vaginella gaasensis</i>    | Oligocene: Rupelian             | 28.1             | Cahuzac & Janssen 2010 |
| c: <i>Cavolinia+Diacavolinia</i>         | <i>Cavolinia microbesitas</i> | Miocene: Late Burdigalian       | 16               | Janssen 2012           |
| d: Cavolinioidea                         | <i>Euchilotheca ganensis</i>  | Eocene: Yresian                 | 47.8             | Curry 1982             |
| e: <i>Limacina</i>                       | <i>Limacina gormani</i>       | Eocene: Ypresian                | 47.8             | Cahuzac & Janssen 2010 |
| f: Limacinoidea                          | <i>Heliconoides</i> sp.       | Cretaceous: Campanian           | 72.1             | Janssen & Goedert 2016 |
| g: Pseudothecosomata                     | <i>Peracle amberae</i>        | Oligocene: Chattian-Burdigalian | 16               | Janssen 2012           |
| h: Gymnosomata                           | <i>Clione ? imdinaensis</i>   | Oligocene: Chattian             | 23               | Janssen 2012           |
| i: Pteropoda+ <i>Aplysia</i>             | <i>Akera neocomiensis</i>     | Cretaceous: Early Hauterivian   | 133              | Cossmann 1895a, b      |

#### **References (supl. material)**

Cahuzac, B. & A. W. Janssen, 2010. Eocene to Miocene pteropods (Gastropoda, Euthecosomata) from the Aquitaine Basin, SW France. *Scripta Geologica*, 141: 1-193

Cossmann M. 1895a. *Essais de paléonchologie comparée*. Première livraison. Comptoir Geologique, Paris.

Cossmann, M. 1895b. Contribution à la paléontologie française des terrains jurassiques. Études sur les gasteropodes des terrains jurassiques. *Mémoires de la Société Géologique de France*. Paléontologie 14:1-165p

Curry, D., 1982. Pteropodes éocènes de la tuilerie de Gan (Pyrénées-Atlantiques) et de quelques autres localités du SW de la France. *Cahiers de Micropaléontologie*, 4: 35-44, 1 pl.

Janssen, A. W., 2012. Systematics and biostratigraphy of holoplanktonic Mollusca from the Oligo-Miocene of the Maltese Archipelago. *Bollettino del Museo Regionale di Scienze Naturali, Torino*, 28(2)(2010): 197-601.

Janssen, A. W. & J. L. Goedert. 2016. Notes on the systematics, morphology and biostratigraphy of fossil holoplanktonic Mollusca, 24. First observation of a genuinely Late Mesozoic tecosomatous pteropod. *Basteria* 80 (1-3):59-63.

Scarsella, F., 1934. Di una nuova specie di pteropodo del Miocene appenninico. *Bollettino della Società Geologica Italiana*, 53(2): 177-181. pl. 13.
